# Supplementary material
Source: MDPI journal article supplement (https://www.mdpi.com/2673-4060/4/1/10)
Supplement: s1 [file s1]

## **Supplementary information**

### **Qualitative Research:**

Title: The COVID-19 Pandemic and Kenya's Health care System, Maternal Health Services utilization (Health Providers and hospital administrators)

### **Socio-Demographics:**

#### **Gender:**

- ☐ Male
- ☐ Female

#### **Age:**

- ☐ 18-30
- ☐ 31-44
- ☐ 44-56
- ☐ 57 and above

#### **Department:**

- ☐ Maternity
- ☐ Maternal Child Health
- ☐ Administration
- ☐ Pharmacy

### **Key Questions for Probing:**

1. How do you handle emergency cases of patients in general during this pandemic? (probe if there were any previous experience in managing patients during health care crisis)
2. Do you have enough protective equipment to handle emergency COVID-19 cases? (probe: whether they are adequate and cater to health care providers' needs).
3. Do you have any restrictions to services provided to pregnant mothers? (probe o the services provided and the kind of restrictions)

4. With the restrictions in health services provision, where do pregnant mothers go to give birth? (probe: what health workers think about the fate of pregnant mothers, how do they get information about home deliveries, consequences of such)
5. Are there alternatives for routine clinic services, the antenatal and postnatal care clinics? (Probe: How COVID-19 pandemic impacted on immunization, prevention and management of pregnancy-related or concurrent diseases, risk identification and screening, and, and health education and promotion; were there any attempts by pregnant mothers to come to health facility for immunizations and other maternal health services)
6. What were some of the drawbacks of the COVID-19 pandemic in serving the expectant mother? (Probe: their experiences handling expectant mothers if any, what challenges did health workers experience handling expectant mother during the entire pandemic period; What can be done to overcome the drawbacks of pandemics and their relevance for maternal health policy).
